# Supplementary material for: A Centrifugal Microfluidic Platform That Separates Whole Blood Samples into Multiple Removable Fractions Due to Several Discrete but Continuous Density Gradient Sections
Source: PLoS One. 2016 Apr 7;11(4):e0153137. doi: 10.1371/journal.pone.0153137 (PMC4824354; doi:10.1371/journal.pone.0153137)
Supplement: S2 Appendix — (XLSX) [file pone.0153137.s002.xlsx]

## Sheet: 1077 lane 1
			1077 lane1
			lueko				flip								flip								flip								flip								flip								flip
	1	RBC
	2
	3
	4
	5
	6
	7
	8
	9
	10
	11																						1
	12																																										1
	13
	14																																		2
	15
	16
	17	microfluidics
	18
	19
	20
	21
	22
	23
	24
	25
	26
	27																																		1
	28
	29														1
	30
	31
	32
	33
	34
	35																										1				2
	36	microfluidics
	37
	38
	39
	40
	41
	42										1
	43
	44
	45
	46														1
	47
	48
	49
	50
	51
	52
	53
	54																						1
	55	microfluidics
	56
	57
	58
	59		2												1																3												2				3
	60		4																1				2				2																2				2
	61																						1				1								1								5				2
	62		2												2				3								2												2				2				3
	63		2								1								4								1				3				1				1				1				3
	64		1								1				1				5				2				0				1								1				4				2
	65		1				3				1				1								3				5				5								4								2
	66		3				1				4				1				3				4				1				2				6				4				3				3
	67		2				6				5				4				4				9				7				8				2				8				6				4
	68		13				8				3				5				1				2				8				10				7				7				11				8
	69		2				7				4				9												10				6				9				15				7				9
	70		5				9				7				11												9				9				5				16				6				9
	71		5				6				7				11												10				8				7				3				3				5
	72	microfluidics	2				3				6				6												7				7				5				3				4				1
